# Supplementary material for: Reference Gene Validation for RT-qPCR, a Note on Different Available Software Packages
Source: PLoS One. 2015 Mar 31;10(3):e0122515. doi: 10.1371/journal.pone.0122515 (PMC4380439; doi:10.1371/journal.pone.0122515)
Supplement: S3 Table — (XLSX) [file pone.0122515.s005.xlsx]

## Sheet: Blad1
FS1 samples
geNorm
with efficiency correction		no efficiency correction		RefFinder
gene	M-value	gene	M-value	gene	M-value
HMBS	0.215984	B2M	0.174175	B2M	0.174175
SDHA	0.215984	TOP2B	0.174175	TOP2B	0.174175
UBC	0.232367	HPRT	0.214434	HPRT	0.214434
TBP	0.255242	TBP	0.226512	TBP	0.226512
YWHAZ	0.267064	IGFR	0.249663	IGFR	0.249663
TOP2B	0.278395	UBC	0.263831	UBC	0.263831
HPRT	0.28707	HMBS	0.281363	HMBS	0.281363
IGFR	0.298765	YWHAZ	0.294724	YWHAZ	0.294724
B2M	0.311609	SDHA	0.304645	SDHA	0.304645
SOX9	0.355042	SOX9	0.3534	SOX9	0.3534
GAPDH	0.400747	GAPDH	0.403002	GAPDH	0.403002
RPS18	0.439404	RPS18	0.445994	RPS18	0.445994
ACTB	0.47266	ACTB	0.48069	ACTB	0.48069
RLP13	0.527278	RLP13	0.532545	RLP13	0.532545
NormFinder
with efficiency correction		no efficiency correction		RefFinder		normqPCR		NormFinder for R
gene	stability value	gene	stability value	gene	stability value	gene	stability value	gene	stability value
RLP13	0.553149	HMBS	0.0999044	HMBS	0.144	HMBS	0.0203688	HMBS	0.14
ACTB	0.409913	TBP	0.118259	TBP	0.171	TBP	0.0224053	TBP	0.15
PRRPS18	0.396519	HPRT1	0.129687	HPRT1	0.187	UBC	0.0269993	UBC	0.16
GAPDH	0.379909	SDHA	0.13148	SDHA	0.19	SDHA	0.0351148	SDHA	0.19
SOX9	0.344627	UBC	0.134074	UBC	0.193	TOP2B	0.0354272	TOP2B	0.19
B2M	0.23519	TOP2B	0.146493	TOP2B	0.211	YWHAZ	0.044566	YWHAZ	0.21
IGF1R	0.192046	YWHAZ	0.169284	YWHAZ	0.244	HPRT	0.0627203	HPRT1	0.25
HPRT1	0.171101	IGF1R	0.175519	IGF1R	0.253	IGFR	0.0773817	IGF1R	0.28
YWHAZ	0.145883	B2M	0.208136	B2M	0.3	B2M	0.116433	B2M	0.34
TOP2B	0.129735	SOX9	0.366121	SOX9	0.528	SOX9	0.248467	SOX9	0.5
SDHA	0.126739	GAPDH	0.394633	GAPDH	0.569	GAPDH	0.300214	GAPDH	0.55
UBC	0.113384	ACTB	0.415402	ACTB	0.599	RPS18	0.324558	RPS18	0.57
HMBS	0.110975	PRRPS18	0.416158	RPS18	0.6	ACTB	0.346008	ACTB	0.59
TBP	0.104413	RLP13	0.543828	RLP13	0.785	RLP13	0.63842	RLP13	0.8
BestKeeper
gene	correlation coefficient	gene	standard deviation
HPRT1	0.968	ACTB	0.32
TOP2B	0.96	SDHA	0.35
TBP	0.959	HMBS	0.44
B2M	0.95	RPS18	0.45
HMBS	0.936	YWHAZ	0.47
IGF1R	0.935	TBP	0.49
UBC	0.924	UBC	0.5
SDHA	0.908	IGF1R	0.51
YWHAZ	0.895	HPRT1	0.55
GAPDH	0.79	SOX9	0.55
SOX9	0.71	TOP2B	0.56
RLP13	0.578	B2M	0.57
RPS18	0.526	GAPDH	0.62
ACTB	0.373	RLP13	0.7
